# Supplementary material
Source: PubMed Central journal article supplement (PMC7047532)
Supplement: NIHMS1068808-supplement-1.pdf [file NIHMS1068808-supplement-1.pdf]

**Cell Systems, Volume 10**

**Supplemental Information**

**Molecular and Functional Networks Linked  
to Sarcopenia Prevention by Caloric  
Restriction in Rhesus Monkeys**

**Timothy W. Rhoads, Josef P. Clark, Grace E. Gustafson, Karl N. Miller, Matthew W. Conklin, Tyler M. DeMuth, Mark E. Berres, Kevin W. Eliceiri, Laura K. Vaughan, Christine W. Lary, T. Mark Beasley, Ricki J. Colman, and Rozalyn M. Anderson**

## Supplemental Figure Legends.

**Fig. S1, related to Table 1. Longitudinal upper leg lean mass for study animals.** The upper leg lean mass as a fraction of body weight (*left*) or total upper leg lean mass in grams (*right*), from DEXA measurements is presented as a function of either time on study (*top*) or animal age (*bottom*). A polynomial regression is fit to each diet group, with 95% confidence intervals denoted by the shaded regions. N = 5 for control and 8 for CR.

**Figure S2, related to Figure 1. Chr7 miRNAs and putative gene targets statistically different between control and CR.** Network diagram depicting miR members of the Chr7 locus and putative targets identified by TargetScan that were also statistically significant between control and CR.

**Fig. S3, related to Fig. 2. Relative expression of lipid metabolism genes.** Box plots of delta Ct values for lipid metabolism genes involved in: Fatty acid biosynthesis (*ACACA*, *FASN*, *SCD*), beta-oxidation (*CPT1A*, *ACADL*), lipid droplet metabolism (*PLIN2*, *PLIN3*, *PLIN4*, *PLIN5*), and lipid biosynthesis (*DGAT2*, *GPAT4*). 18S rRNA is used as the reference gene. N = 5 for control and 8 for CR.

**Figure S4, related to Figure 4. Activity counts.** Accelerometer counts for morning (*left*), afternoon (*middle*), and night (*right*) time periods. N = 5 for control and 8 for CR (box – Inter-quartile range, whiskers – minimum and maximum values, bar – median, small box – mean).

**Figure S5, related to Figure 4. Regression analysis of skeletal muscle mass.** Linear regressions of skeletal muscle mass measures with age and activity counts; ESM % of peak vs. age (*top*), ESM % of peak vs. 24 hour accelerometer counts (*middle*), and UL Lean % of peak vs. night accelerometer counts (*bottom*).

**Fig. S1, related to Table 1**

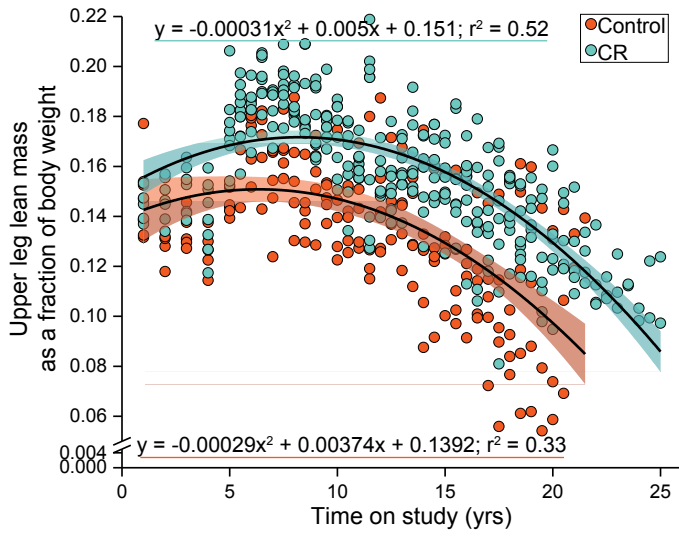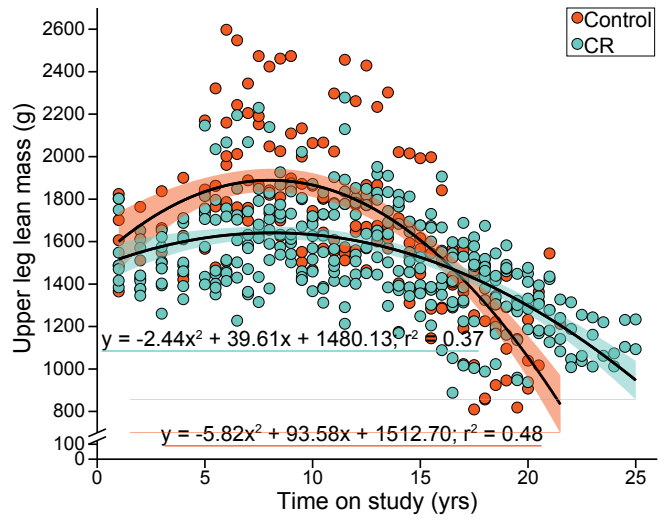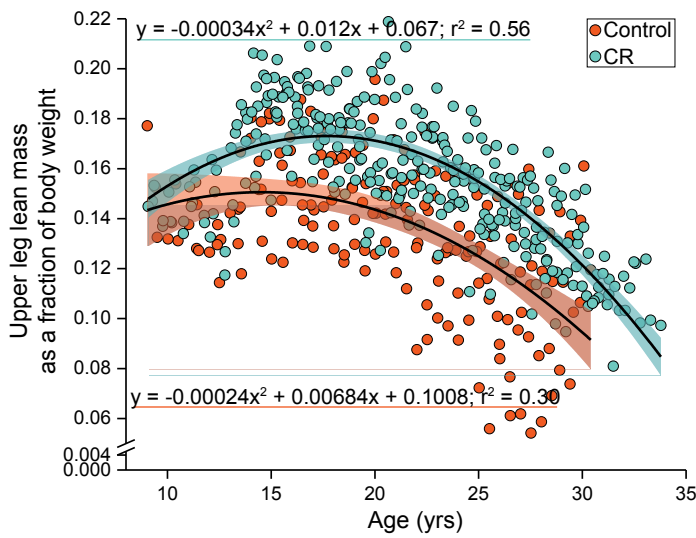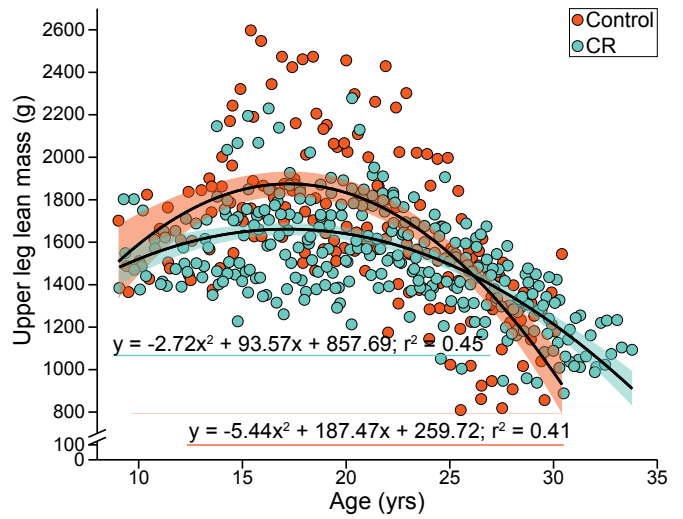

**Fig. S2, related to Fig. 1**

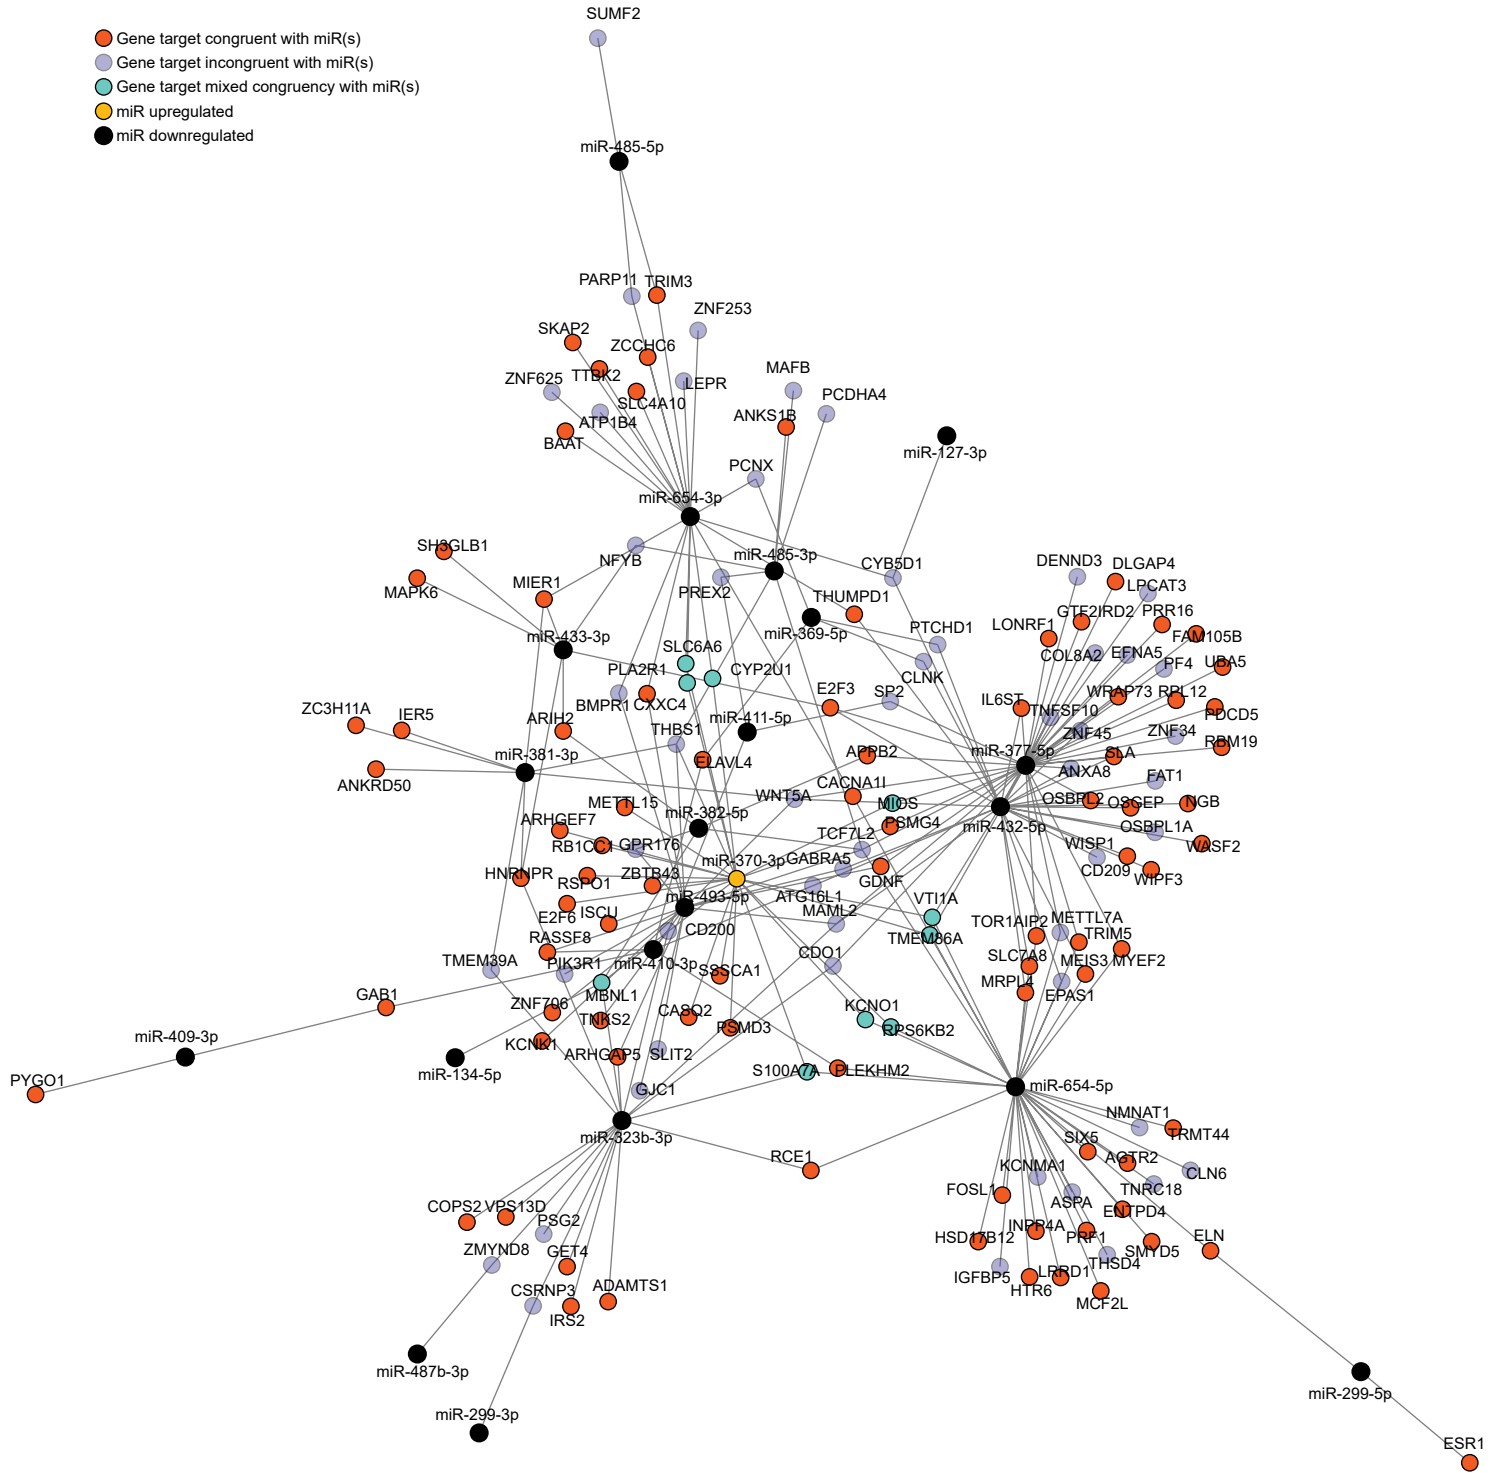

Fig. S3, related to Fig.2

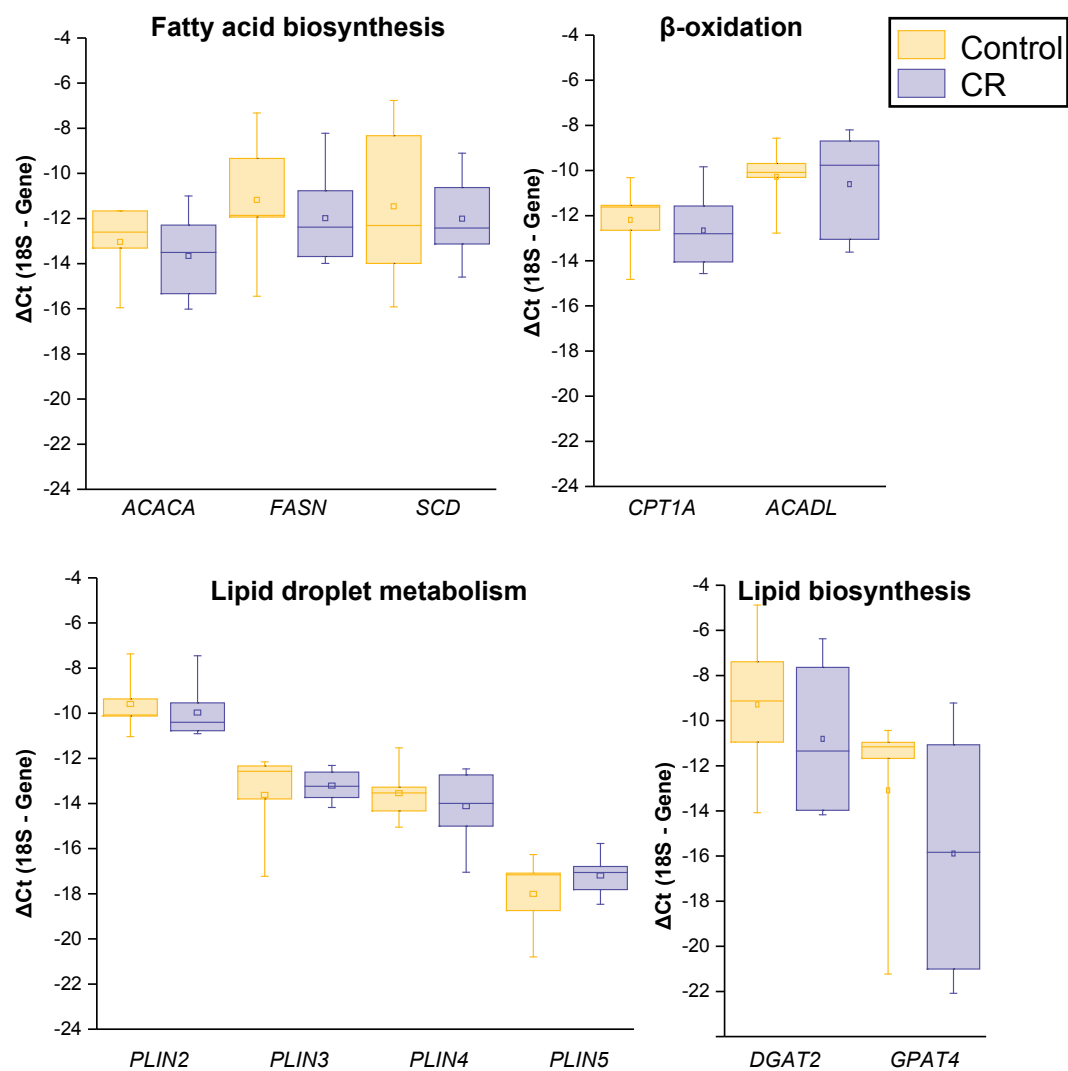

**Fig. S4, related to Fig. 4**

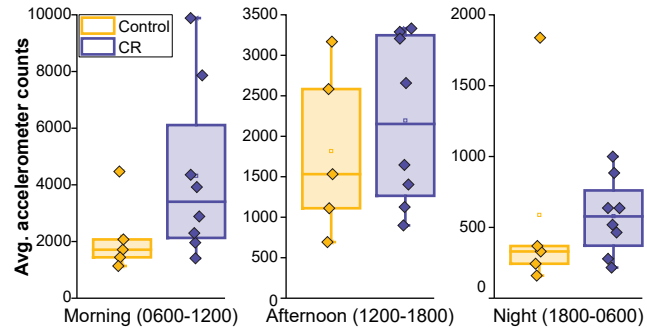

Figure S5, related to Figure 4

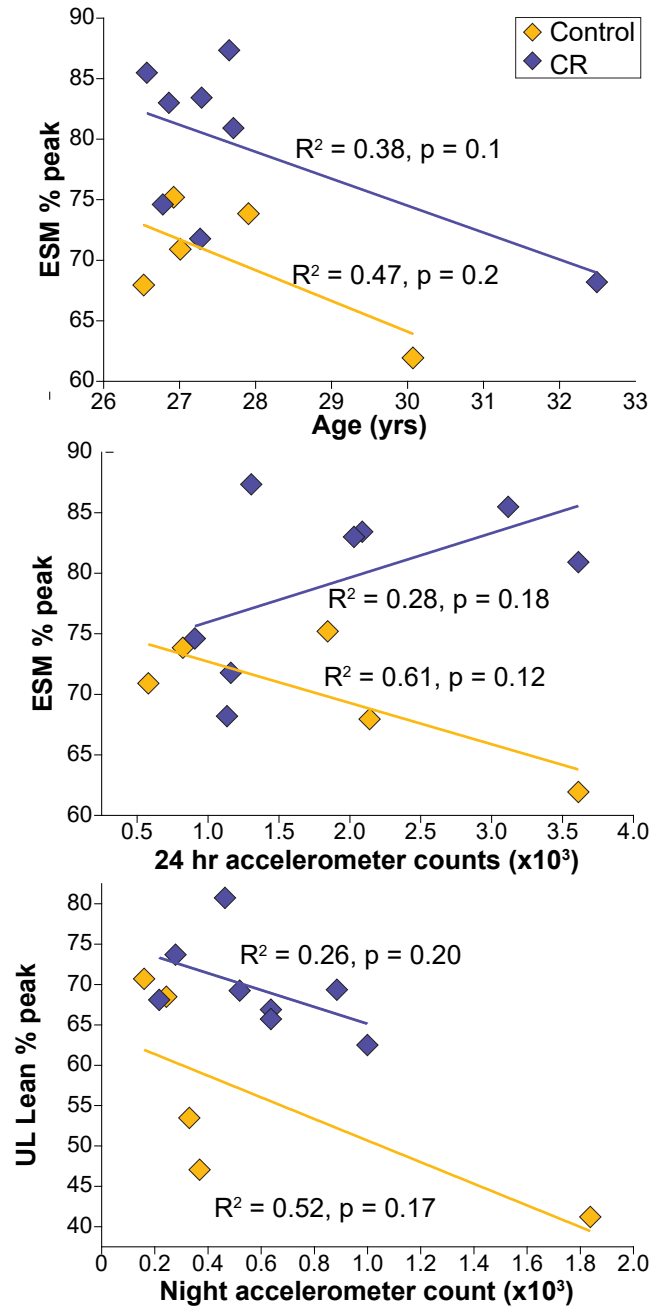

**Table S1, related to Figure 1; Microarray analysis**

Formatted as excel sheet with 3 tabs:

- BAM genes
- PAGE pathways
- IPA details



**Table S2, related to Figure 1; MicroRNA analysis**

Formatted as excel sheet with 2 tabs:

- All miRs
- Families/loci of interest

**Table S3, related to Figure 2; 2-photon microscopy lifetime components**

| Lifetime component | Control mean          | CR mean               | F-stat  | p-value   |
|--------------------|-----------------------|-----------------------|---------|-----------|
| $\tau_M$ (ps)      | 1024.603 $\pm$ 86.650 | 924.025 $\pm$ 41.280  | 305.210 | < 0.0001* |
| $\tau_1$ (ps)      | 406.735 $\pm$ 32.389  | 383.676 $\pm$ 30.844  | 36.26   | < 0.0001* |
| $\tau_2$ (ps)      | 2328.184 $\pm$ 67.003 | 2220.502 $\pm$ 93.971 | 40.31   | < 0.0001* |
| $a_1$ (%)          | 67.856 $\pm$ 2.934    | 70.681 $\pm$ 0.622    | 187.62  | < 0.0001* |

All data is presented as sample mean  $\pm$  standard deviation

\*p < 0.05

**Table S4, related to Figure 3; Fiber histology parameters**

| Measure                       | Control                     | CR                          | Fstat       | p-value      |
|-------------------------------|-----------------------------|-----------------------------|-------------|--------------|
| <i>Fiber size</i>             |                             |                             |             |              |
| Type I (pixel <sup>2</sup> )  | 48369.551 ± 24057.213       | 46543.754 ± 16048.230       | .02         | 0.882        |
| Type II (pixel <sup>2</sup> ) | 45612.918 ± 23128.762       | 68979.970 ± 34874.971       | 1.77        | 0.186        |
| MMF (pixel <sup>2</sup> )     | 58394.446 ± 20459.225       | 95402.143 ± 46398.013       | 3.41        | 0.067        |
| <i>Cyt c Ox intensity</i>     |                             |                             |             |              |
| <b>Type I</b>                 | <b>42.757 ± 13.602</b>      | <b>70.353 ± 17.075*</b>     | <b>5.39</b> | <b>0.022</b> |
| Type II                       | 48.697 ± 19.863             | 45.000 ± 15.864             | 0.08        | 0.780        |
| MMF                           | 18.778 ± 9.593              | 15.927 ± 7.529              | 0.84        | 0.361        |
| <i>Intensity localization</i> |                             |                             |             |              |
| Mid                           | 118.149 ± 17.010            | 138.272 ± 18.216            |             | 0.173        |
| <b>Perimeter</b>              | <b>152.509 ± 24.023</b>     | <b>187.790 ± 27.730*</b>    |             | <b>0.021</b> |
|                               | <b>p-value &lt; 0.0001*</b> | <b>p-value &lt; 0.0001*</b> |             |              |
|                               | <b>Control mid vs peri</b>  | <b>CR mid vs peri</b>       |             |              |
| % non-contractile area        | 19.806 ± 12.292             | 12.214 ± 3.592              | 13.26       | 0.005        |

**Table S5, related to Figure 4.** P values for differences in variance between diet groups across biometric measures

| <b>Biometric</b>                                                | <b><i>p-value</i></b>         |
|-----------------------------------------------------------------|-------------------------------|
| <b>Body weight (g)</b>                                          | <b>4.39 x 10<sup>-3</sup></b> |
| Total lean mass (g)                                             | 0.75                          |
| % fat                                                           | 0.05                          |
| ESM as % of peak                                                | 0.34                          |
| <b>UL lean as % of peak</b>                                     | <b>0.01</b>                   |
| Basal glucose (mg/dL)                                           | 0.12                          |
| Basal insulin ( $\mu$ U/mL)                                     | 0.09                          |
| Insulin sensitivity index; Si ( $\times 10^{-4}$ )              | 0.23                          |
| <b>Metabolic cost of movement (<math>\times 10^{-4}</math>)</b> | <b>0.03</b>                   |
